# Supplementary material
Source: publisher figshare collection journal article supplement (https://aacr.figshare.com/articles/dataset/_/23553174)
Supplement: Supplementary file 1 [file 41323683]

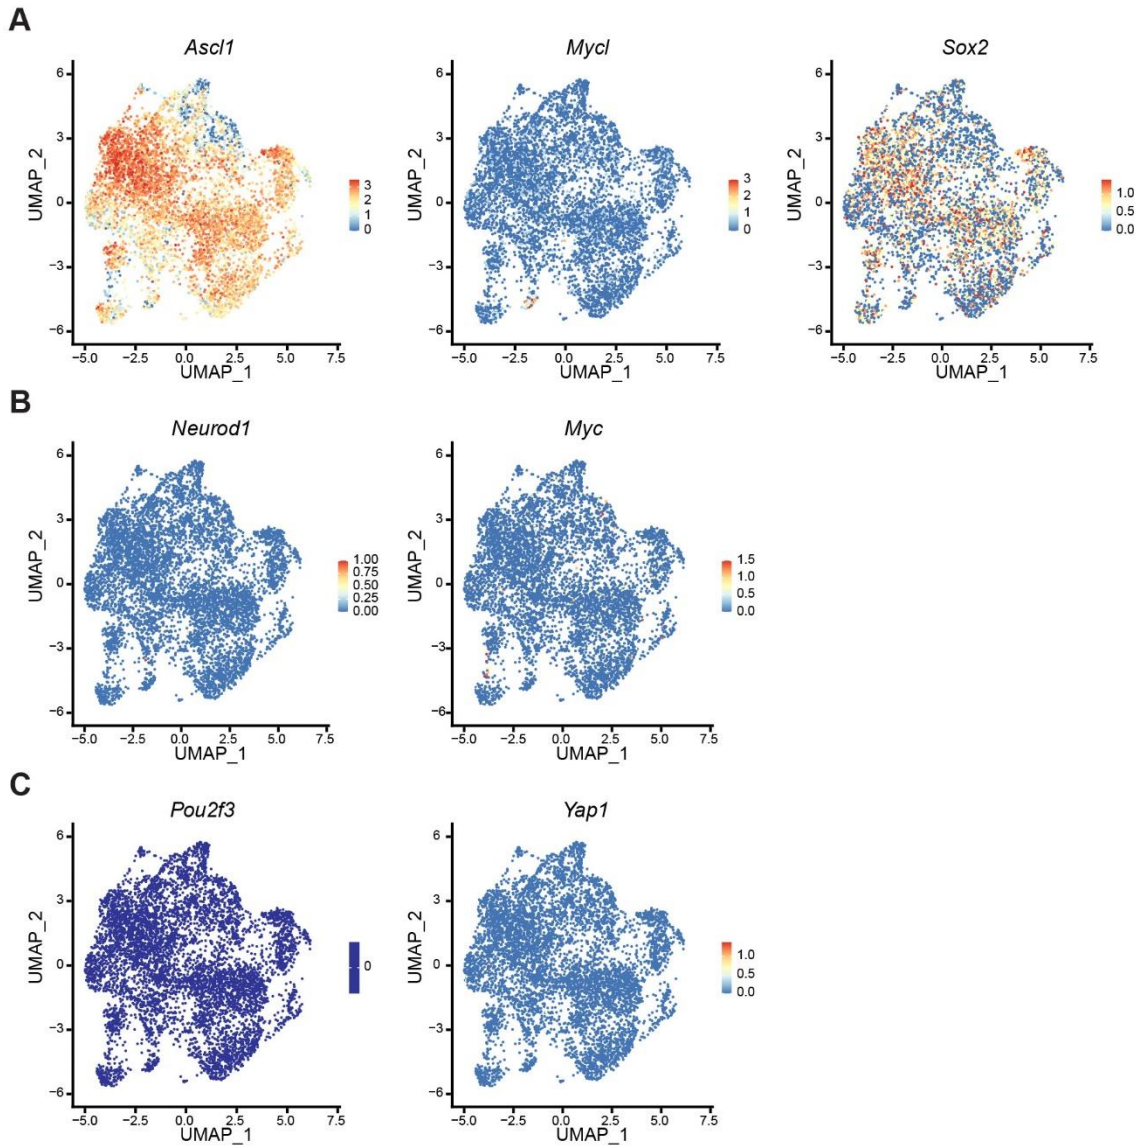

**Supplementary Figure S3 | SCLC Subtype-specific marker expression from the RPR2-Cas9 mouse model. A,** Markers for the SCLC-A subtype including *Ascl1*, *Mycl*, and *Sox2*. **B,** SCLC-N subtype markers including *Neurod1* and *Myc*. **C,** Expression of non-neuroendocrine SCLC markers *Pou2f3* and *Yap1*.
